# Supplementary material for: Reproducibility of Glutamate, Glutathione, and GABA Measurements in vivo by Single-Voxel STEAM Magnetic Resonance Spectroscopy at 7-Tesla in Healthy Individuals
Source: PubMed Central journal article supplement (PMC7522573; doi:10.3389/fnins.2020.566643), 2020-09-15
Supplement: Table_1.pdf [file Table_1.pdf]

### Supplementary Table 1 – Other consistently acquired metabolites

(NAA = N-acetylaspartate; GLN = Glutamine; INS = Inositol; Total Cr = Creatine + Phosphocreatine)

| <b>Variable: Mean(±SD)</b>              | <b>NAA</b>  | <b>GLN</b>    | <b>INS</b>  | <b>Total Cr</b> |
|-----------------------------------------|-------------|---------------|-------------|-----------------|
| Concentration - Day 1/Scan 1 (mM)       | 12.01±0.81  | 2.27±0.49     | 7.67±1.20   | 8.94±0.78       |
| Concentration - Day 1/Scan 2 (mM)       | 11.46±0.93  | 2.13±0.49     | 7.14±0.76   | 8.54±0.67       |
| Concentration - Day 2/Scan 1 (mM)       | 11.93±0.72  | 2.28±0.23     | 7.69±0.94   | 8.81±0.63       |
| Concentration - Day 2/Scan 2 (mM)       | 12.29±1.64  | 2.19±0.42     | 7.59±0.90   | 9.00±1.34       |
| CoV - Day 1 (both scans)                | 4.98%±3.19% | 8.23%±6.32%   | 5.01%±5.17% | 5.32%±3.70%     |
| CoV - Day 2 (both scans)                | 6.09%±6.27% | 11.63%±8.42%  | 8.08%±6.12% | 6.27%±6.03%     |
| CoV - 1 <sup>st</sup> scans (both days) | 3.31%±2.27% | 11.14%±10.18% | 4.33%±3.12% | 2.94%±2.27%     |
| CoV - 2 <sup>nd</sup> scans (both days) | 5.90%±5.80% | 10.96%±8.67%  | 6.91%±5.80% | 7.33%±7.34%     |

## Supplementary Table 2 - Raw uncorrected water-scaled data

(GABA =  $\gamma$ -amino butyric acid; GLUT = Glutamate; GSH = Glutathione; NAA = N-acetylaspartate; GLN = Glutamine; INS = Inositol; Total Cr = Creatine + Phosphocreatine. For creatine-scaling divide by total creatine data columns)

| Metabolite | Participant | Day 1                |                      | Day 2                |                      | Metabolite | Participant | Day 1                |                      | Day 2                |                      |
|------------|-------------|----------------------|----------------------|----------------------|----------------------|------------|-------------|----------------------|----------------------|----------------------|----------------------|
|            |             | 1 <sup>st</sup> scan | 2 <sup>nd</sup> scan | 1 <sup>st</sup> scan | 2 <sup>nd</sup> scan |            |             | 1 <sup>st</sup> scan | 2 <sup>nd</sup> scan | 1 <sup>st</sup> scan | 2 <sup>nd</sup> scan |
| GABA       | 1           | 1.242                | 0.74                 | 1.101                | 1.343                | NAA        | 1           | 9.740                | 8.653                | 9.033                | 8.673                |
|            | 2           | 1.093                | 1.254                | 1.461                | 1.326                |            | 2           | 8.174                | 8.046                | 8.504                | 8.581                |
|            | 3           | 0.822                | 0.813                | 0.913                | 0.957                |            | 3           | 8.023                | 7.622                | 8.630                | 8.534                |
|            | 4           | 1.068                | 1.282                | 1.223                | 1.127                |            | 4           | 9.019                | 9.070                | 8.826                | 8.957                |
|            | 5           | 0.941                | 1.122                | 0.828                | 0.977                |            | 5           | 8.387                | 8.563                | 7.574                | 7.533                |
|            | 6           | 1.061                | 1.405                | 1.125                | 1.221                |            | 6           | 8.216                | 9.464                | 8.796                | 9.244                |
|            | 7           | 1.121                | 1.241                | 1.295                | 1.187                |            | 7           | 7.921                | 8.814                | 8.317                | 8.734                |
|            | 8           | 1.064                | 0.966                | 0.98                 | 1.017                |            | 8           | 8.017                | 8.022                | 8.166                | 8.127                |
|            | 9           | 1.239                | 1.15                 | 1.143                | 1.074                |            | 9           | 9.020                | 9.183                | 8.439                | 8.476                |
|            | 10          | 1.005                | 1.024                | 1.01                 | 1.219                |            | 10          | 7.768                | 7.879                | 8.158                | 8.422                |
| GLUT       | 1           | 7.827                | 8.035                | 7.602                | 7.865                | GLN        | 1           | 1.147                | 1.041                | 1.923                | 1.442                |
|            | 2           | 6.773                | 6.745                | 7.387                | 7.091                |            | 2           | 1.851                | 1.787                | 1.551                | 1.281                |
|            | 3           | 6.552                | 6.064                | 6.983                | 6.824                |            | 3           | 1.387                | 1.264                | 1.657                | 1.364                |
|            | 4           | 7.71                 | 7.289                | 7.625                | 7.718                |            | 4           | 2.073                | 2.190                | 1.817                | 1.918                |
|            | 5           | 7.536                | 7.386                | 6.874                | 6.582                |            | 5           | 1.546                | 1.675                | 1.590                | 1.254                |
|            | 6           | 7.072                | 8.039                | 7.213                | 7.494                |            | 6           | 1.734                | 1.939                | 1.579                | 1.673                |
|            | 7           | 8.02                 | 8.122                | 7.816                | 7.909                |            | 7           | 1.774                | 1.499                | 1.575                | 1.387                |
|            | 8           | 6.845                | 6.588                | 6.624                | 6.707                |            | 8           | 1.709                | 1.441                | 1.573                | 1.810                |
|            | 9           | 7.19                 | 7.213                | 6.876                | 6.84                 |            | 9           | 1.306                | 1.559                | 1.435                | 1.524                |
|            | 10          | 6.915                | 6.679                | 7.5                  | 7.579                |            | 10          | 1.287                | 1.369                | 1.463                | 1.535                |
| GSH        | 1           | 1.123                | 1.012                | 1.072                | 1.069                | INS        | 1           | 4.853                | 4.862                | 5.438                | 4.999                |
|            | 2           | 1.496                | 1.326                | 1.317                | 1.306                |            | 2           | 5.605                | 5.530                | 6.004                | 5.660                |
|            | 3           | 1.295                | 1.404                | 1.342                | 1.161                |            | 3           | 5.483                | 5.189                | 5.600                | 5.558                |
|            | 4           | 1.391                | 1.45                 | 1.389                | 1.26                 |            | 4           | 4.879                | 4.991                | 5.092                | 5.067                |
|            | 5           | 1.372                | 1.4                  | 1.229                | 1.303                |            | 5           | 5.962                | 5.604                | 5.266                | 5.440                |
|            | 6           | 1.324                | 1.68                 | 1.1                  | 1.382                |            | 6           | 4.303                | 4.573                | 4.149                | 4.310                |
|            | 7           | 1.384                | 1.381                | 1.285                | 1.271                |            | 7           | 6.212                | 5.763                | 5.999                | 5.967                |
|            | 8           | 1.284                | 1.16                 | 1.325                | 1.469                |            | 8           | 5.100                | 5.001                | 4.934                | 4.734                |
|            | 9           | 1.129                | 1.522                | 1.127                | 1.169                |            | 9           | 6.040                | 6.231                | 5.943                | 5.487                |
|            | 10          | 1.19                 | 1.278                | 1.554                | 1.306                |            | 10          | 5.116                | 5.333                | 5.992                | 5.658                |
| Total Cr   | 1           | 6.124                | 7.165                | 6.260                | 5.912                |            |             |                      |                      |                      |                      |
|            | 2           | 6.139                | 6.165                | 6.311                | 6.424                |            |             |                      |                      |                      |                      |
|            | 3           | 6.317                | 5.854                | 6.489                | 6.276                |            |             |                      |                      |                      |                      |
|            | 4           | 6.340                | 6.329                | 6.048                | 6.224                |            |             |                      |                      |                      |                      |
|            | 5           | 6.799                | 6.707                | 6.677                | 6.242                |            |             |                      |                      |                      |                      |
|            | 6           | 6.406                | 6.354                | 6.183                | 6.578                |            |             |                      |                      |                      |                      |
|            | 7           | 6.671                | 6.680                | 6.373                | 6.311                |            |             |                      |                      |                      |                      |
|            | 8           | 5.765                | 5.818                | 5.842                | 5.807                |            |             |                      |                      |                      |                      |
|            | 9           | 6.250                | 6.543                | 6.020                | 6.199                |            |             |                      |                      |                      |                      |
|            | 10          | 5.749                | 5.933                | 6.136                | 6.305                |            |             |                      |                      |                      |                      |
